# Supplementary material
Source: publisher site journal article supplement (https://www.dovepress.com/article/458363)
Supplement: Supplementary file 1 [file get_supplementary_file.php]

Supplementary figures and figure legends

Supplementary figure 1. Receiver operating characteristics (ROC) curve analysis. The performances of the neutrophil-to-albumin ratio (NAR) to discriminate diarrhea-predominant irritable bowel syndrome (IBS-D) from controls were determined by ROC curve analysis. A cut-off value of 1.43 with sensitivity of 71.1%, specificity of 61.6%. AUC, area under the ROC curve. p < 0.05 was considered significant.
